# Supplementary material for: Direct Conversion of Human Fibroblasts into Adipocytes Using a Novel Small Molecular Compound: Implications for Regenerative Therapy for Adipose Tissue Defects
Source: MDPI journal article supplement (doi:10.3390/cells10030605), 2021-03-09
Supplement: s1 [file s1]

Supplementary Table S1    List of real-time RT-PCR primers and probes

| Target   | Description/Sequences                |
|----------|--------------------------------------|
| hβ-actin | Applied Bioscience Hs01060665_g1     |
| hSREBF1  | Applied Bioscience Hs01088691_m1     |
| hC/EBPα  | Applied Bioscience Hs00269972_s1     |
| hC/EBPβ  | Applied Bioscience Hs00942496_s1     |
| hC/EBPδ  | Applied Bioscience Hs00270931_s1     |
| hKLF15   | Applied Bioscience Hs00362736_m1     |
| hFABP    | Applied Bioscience Hs01086177_m1     |
| hAdipoq  | Applied Bioscience Hs00605917_m1     |
| hDLK1    | Applied Bioscience Hs00171584_m1     |
| hCD24    | Applied Bioscience Hs00909233_m1     |
| hNANOG   | Applied Bioscience Hs03044178_g1     |
| hOct3/4  | Applied Bioscience Hs00999634_g1     |
| hDIO2    | Applied Bioscience Hs00988260_m1     |
| hPRDM16  | Applied Bioscience Hs00223161_m1     |
| hKCNK3   | Applied Bioscience Hs00605529_m1     |
| hC-MYC   | Applied Bioscience Hs00153408_m1     |
| hUCP1    | Forward: 5'-AAGTGTGCCCAACTGTGCAAT-3' |
|          | Reverse: 5'-TGACGTTCCAGGATCCAAGTC-3' |



Supplementary Figure S1

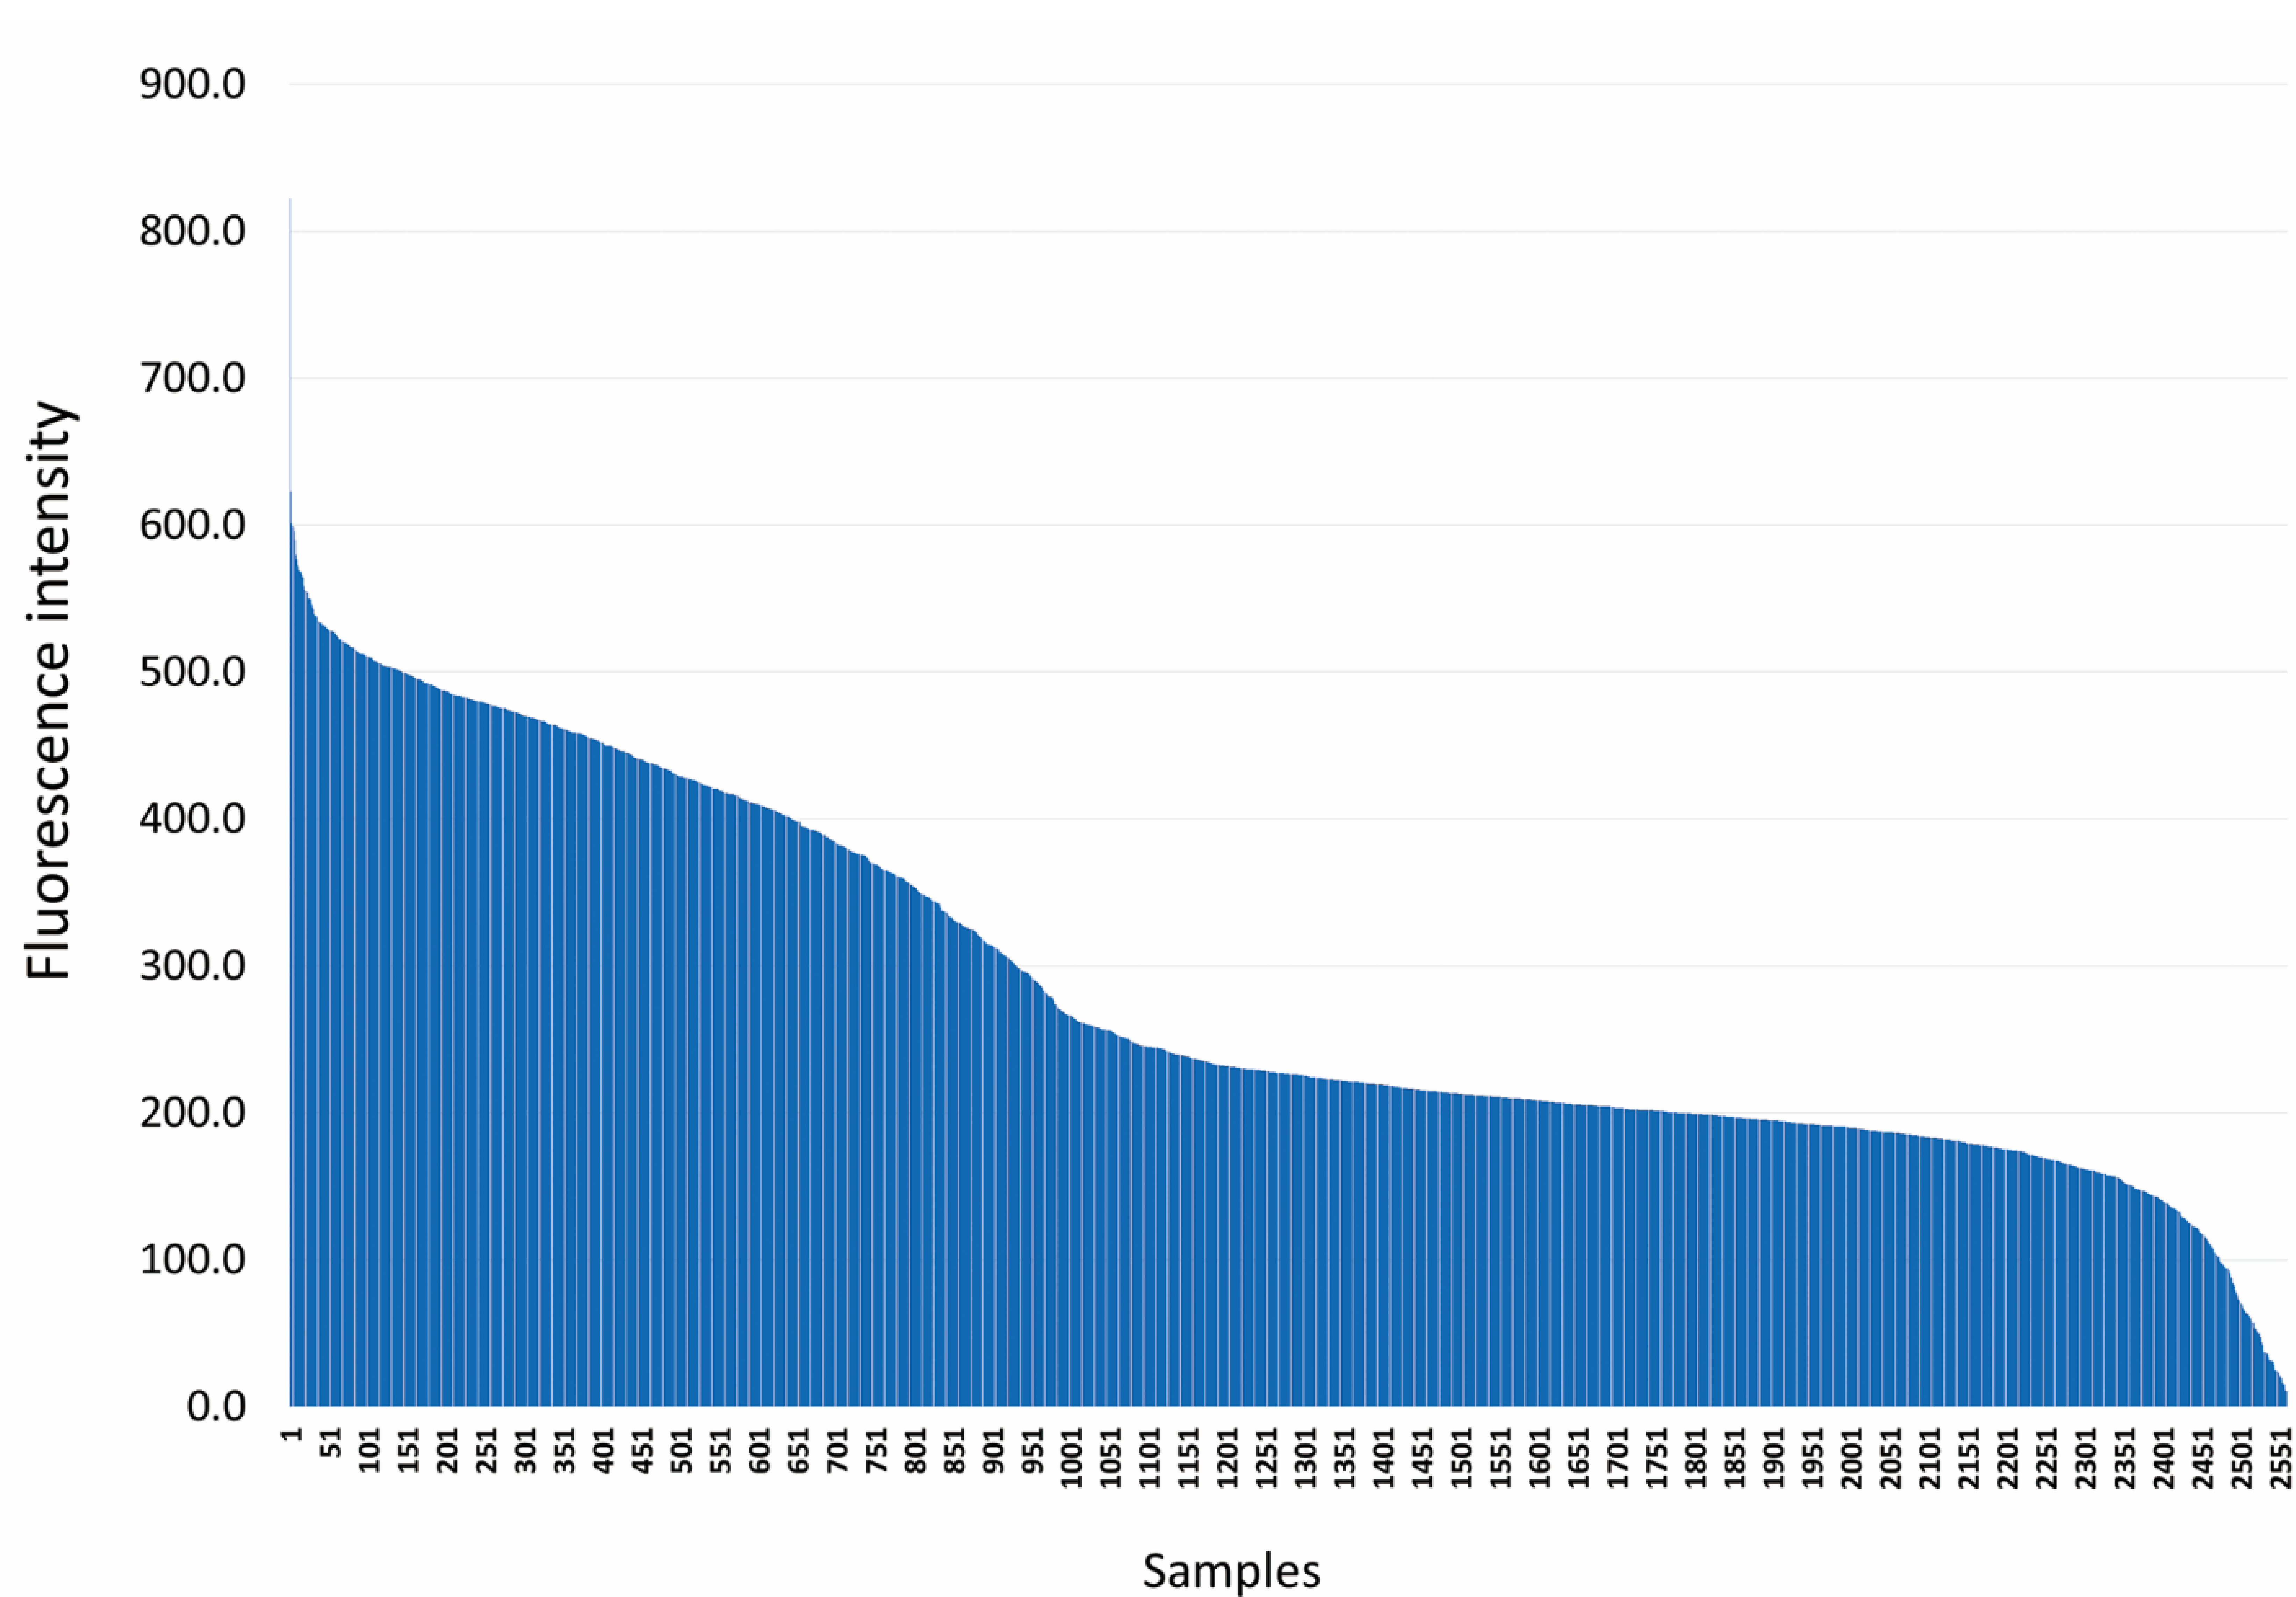

Supplementary Fig. S1

First screening of the chemical compounds were performed as described in the text. Fluorescence intensities of representative samples are shown, in such a manner that the samples are sorted in descending order.



## Supplementary Figure S2

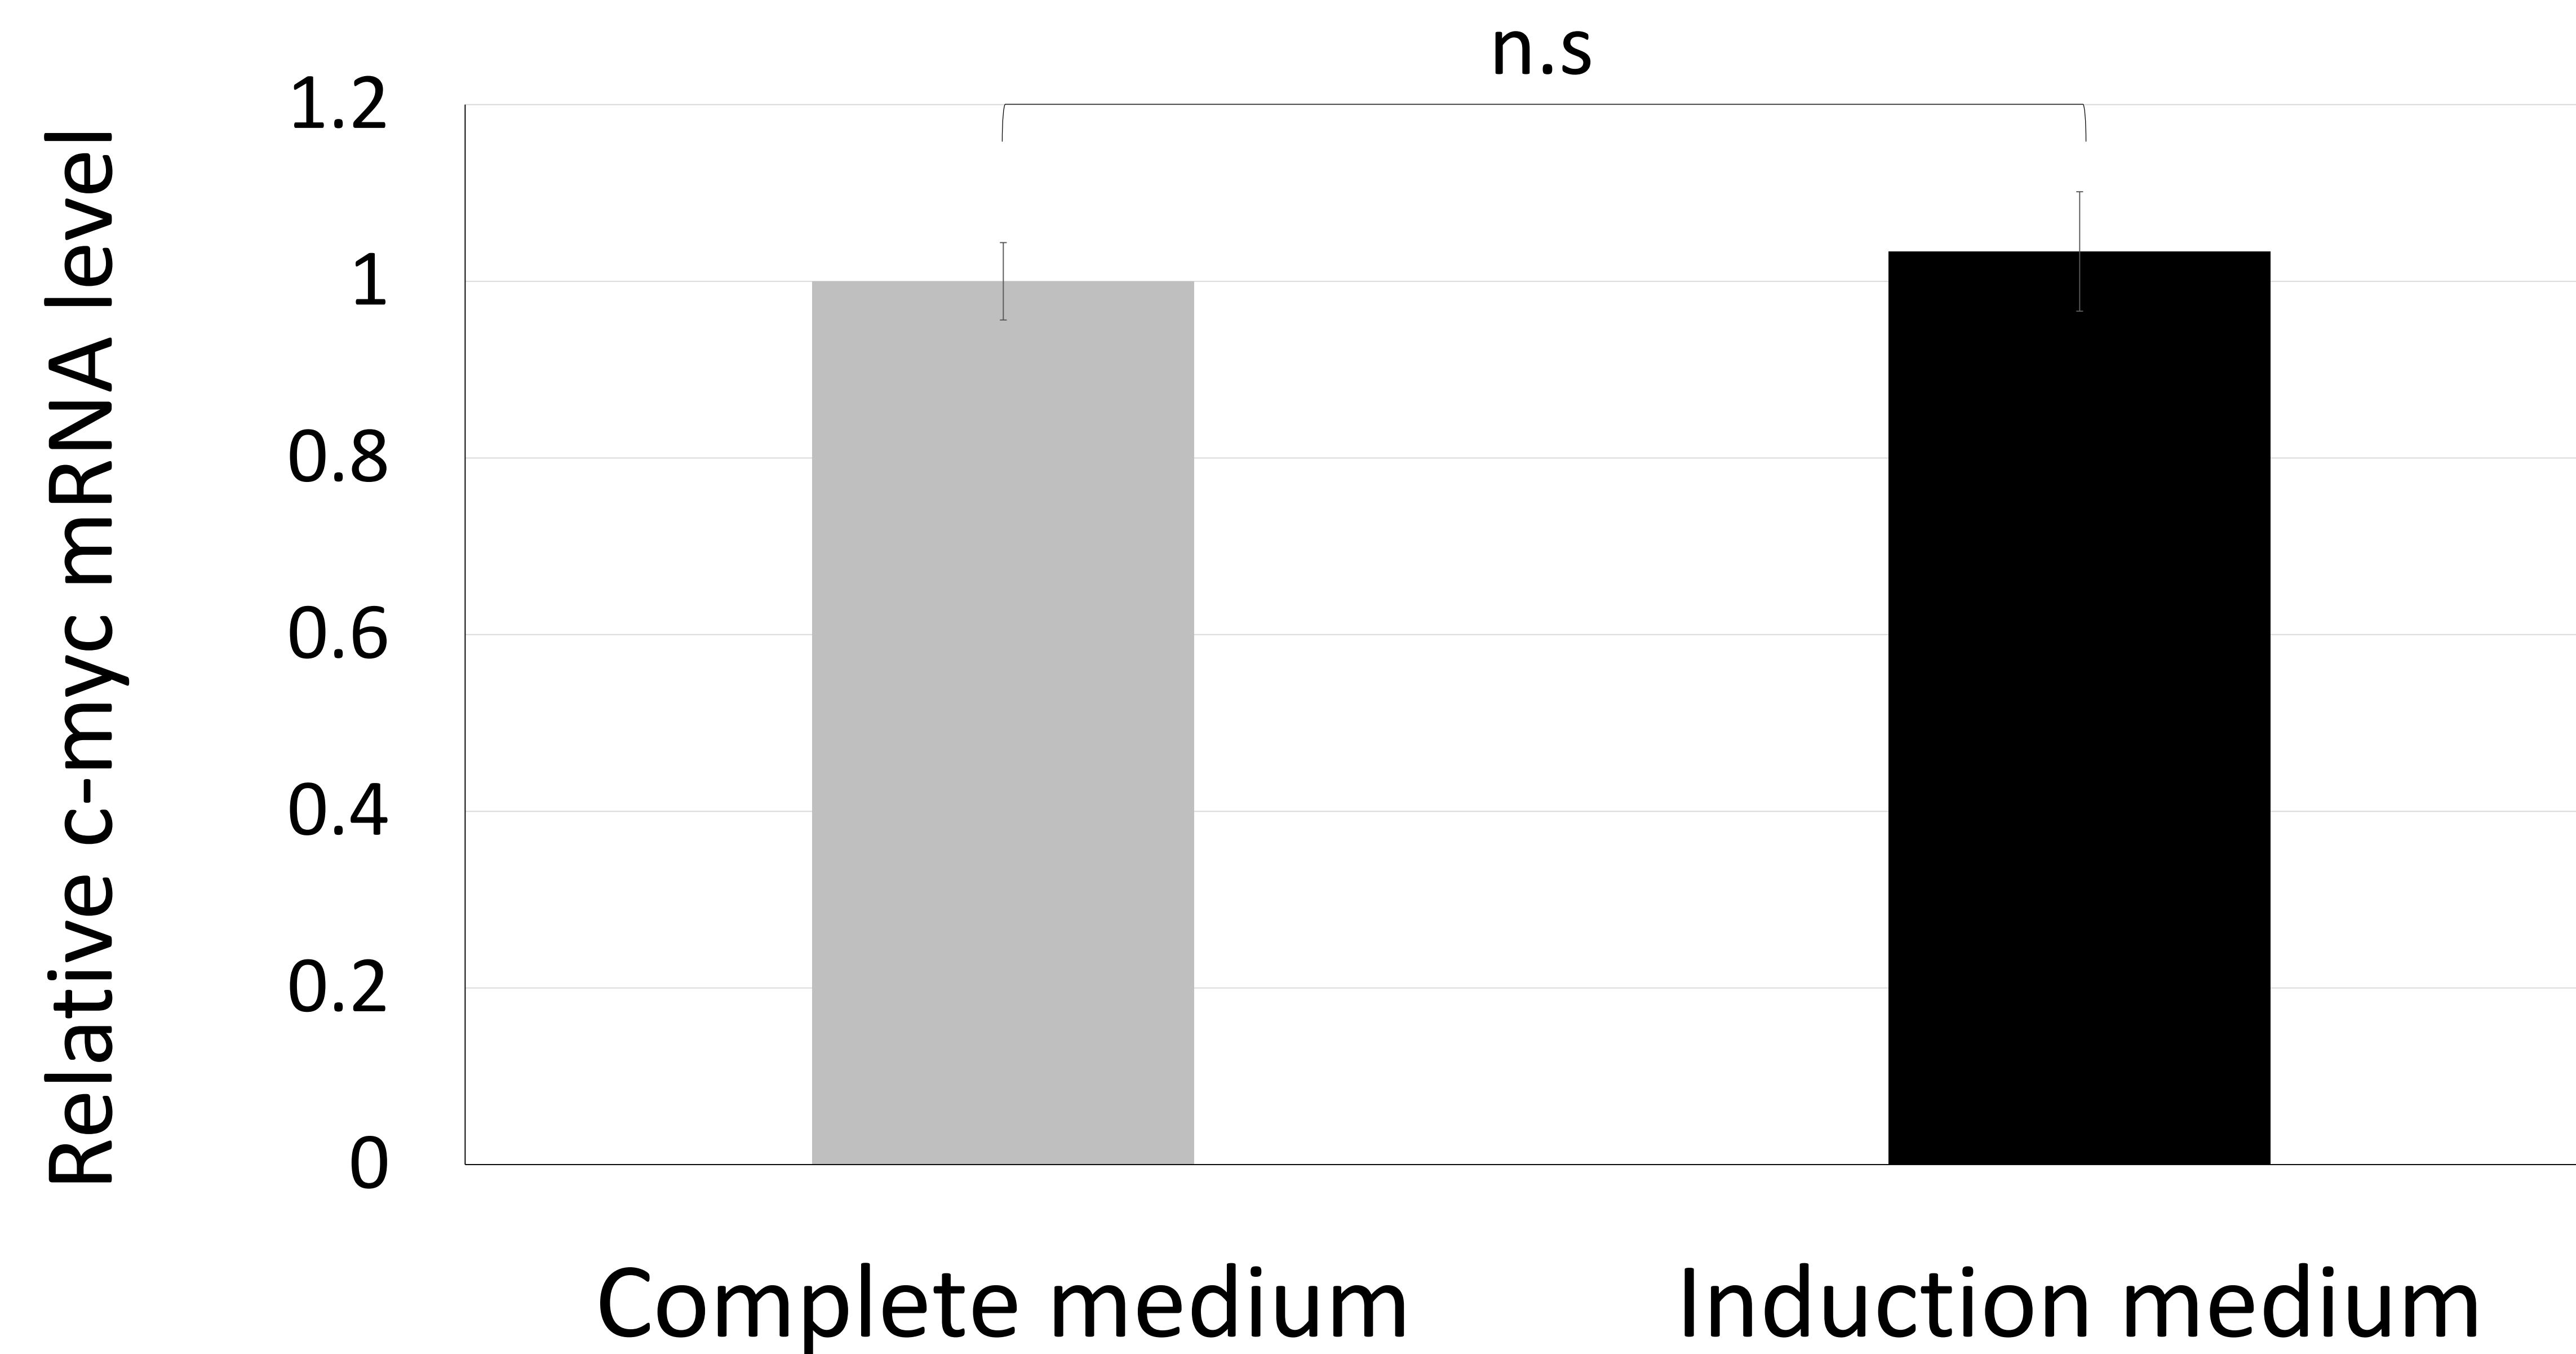

Supplementary Fig. S2.

c-myc expression was not affected by insulin, IBMX and dexamethasone. HDFs were cultured in complete medium lacking insulin, IBMX and dexamethasone or in induction medium containing insulin, IBMX and dexamethasone. Three days later RNA was extracted and c-myc mRNA level was analyzed by real-time RT-PCR. n.s: not significant.



## Supplementary Figure S3

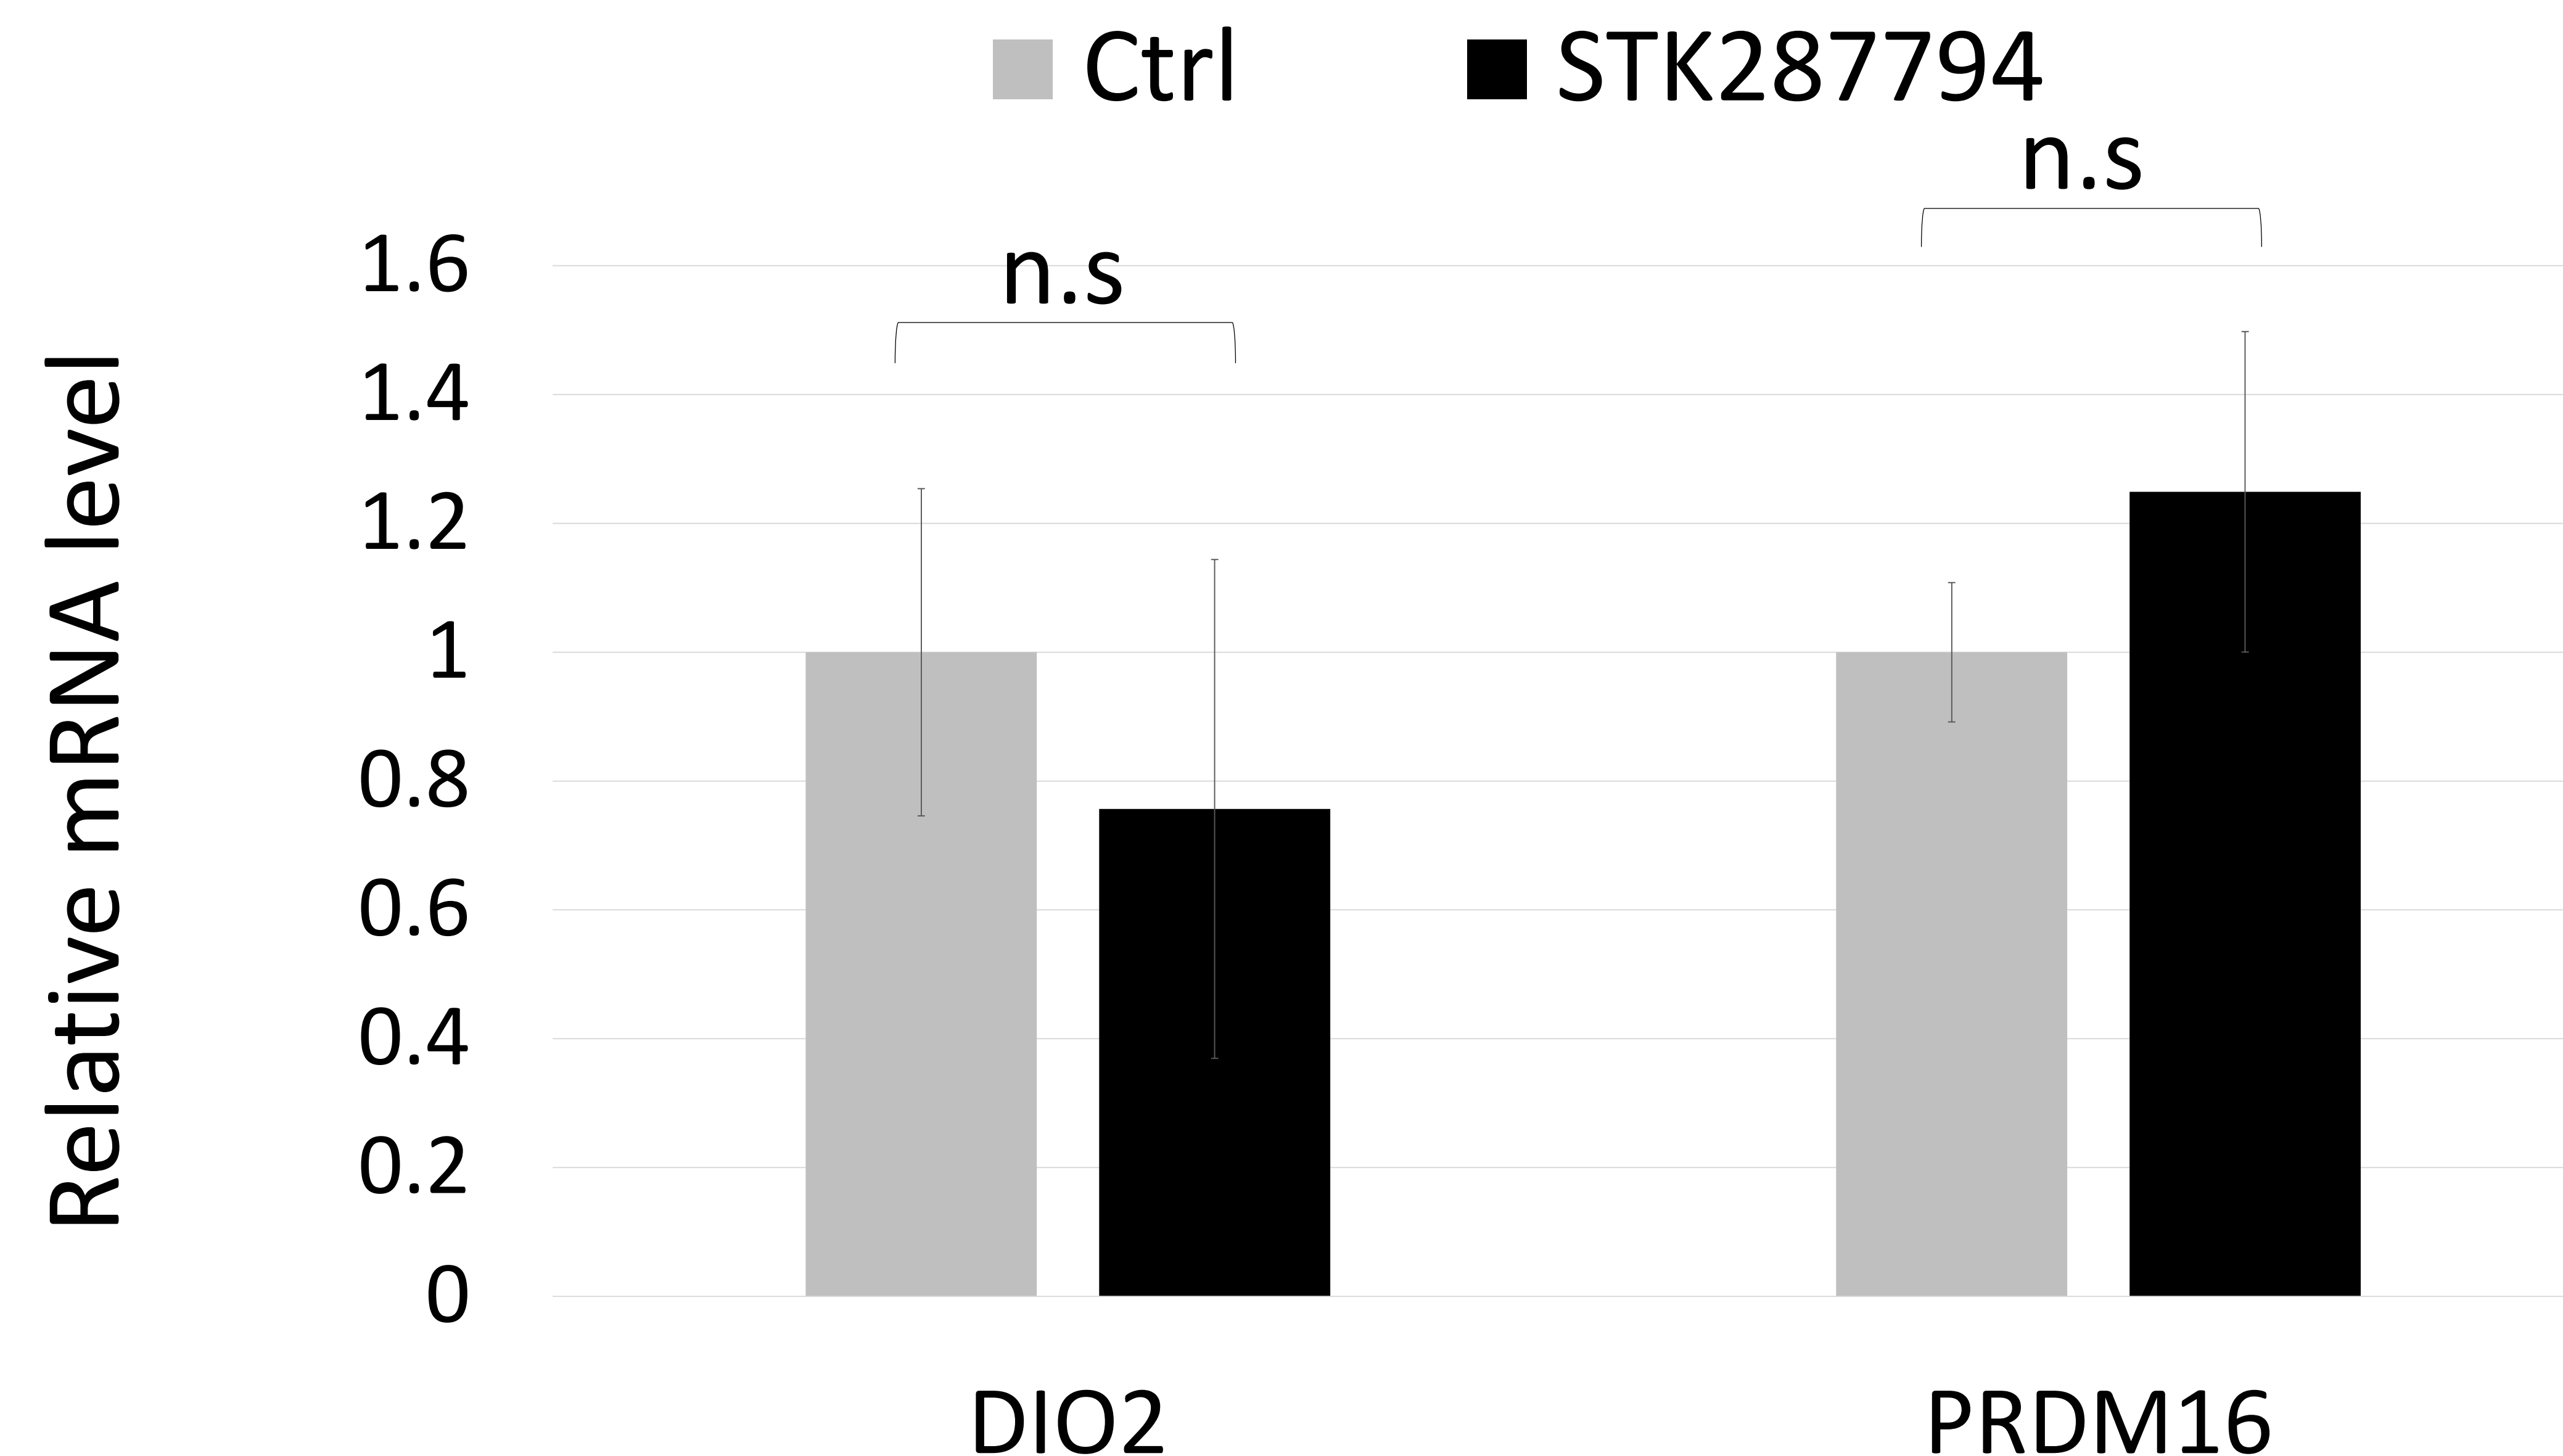

### Supplementary Fig. S3

CCAs did not significantly express brown/beige adipocyte markers. HDFs were cultured in Induction Medium with or without 1  $\mu$ M STK287794. After 14 days, RNA was extracted from the cells and mRNA for the indicated genes was evaluated by real-time RT-PCR. Value (mean  $\pm$  SD) is normalized with respect to the  $\beta$ -actin mRNA level in each sample. Relative values to control (cells cultured without STK287794; set to 1.0) are shown (n=6 for each group). n.s: not significant.
